# Supplementary material for: Effect of Essential Oils on Growth Inhibition, Biofilm Formation and Membrane Integrity of Escherichia coli and Staphylococcus aureus
Source: MDPI journal article supplement (doi:10.3390/antibiotics10121474), 2021-11-30
Supplement: s1 [file s1]

# Effect of Essential Oils on Growth inhibition, Biofilm Formation and Membrane Integrity of *Escherichia coli* and *Staphylococcus aureus*

Andrés Martínez, Marcela Manrique-Moreno, Maria C. Klaiss-Luna, Elena Stashenko, German Zafra<sup>4</sup>, and Claudia Ortiz.

## Supplemental material

**Table S1.** Major metabolites present in the EOs assessed. Relative amount of each metabolite is reported in percentage (%).

| Abbrev.  | Plant Species                 | Chemotype          | Principal metabolites                                                                                                                                   |
|----------|-------------------------------|--------------------|---------------------------------------------------------------------------------------------------------------------------------------------------------|
| LACA     | <i>Lippia alba</i>            | Carvona            | Limonene (29%), $\beta$ -bourbonone (2.4%), germacrene D (12.2%), carvone (31.3%), and piperitenone (1.5%)                                              |
| LACI     | <i>Lippia alba</i>            | Citral             | Limonene (3.9%), <i>trans</i> - $\beta$ -caryophyllene (11.8%), neral (15.4%), geranial (18.9%), and geraniol (6.1%)                                    |
| CN       | <i>Cymbopogon nardus</i>      |                    | Citronellal (11.6%), 2,6-dimethyl-2,6-octadiene (6.1%), $\beta$ -citronellol (16.9%), and geraniol (17.8%)                                              |
| CM       | <i>Cymbopogon martini</i>     |                    | <i>trans</i> - $\beta$ -Ocimene (1.9%), linalool (3.2%), geranyl acetate (1.3%), and geraniol (38.7%)                                                   |
| CF       | <i>Cymbopogon flexuosos</i>   |                    | Neral (24.5%), geranial (33%), geraniol (7.9%), and geranyl acetate (0.5%)                                                                              |
| LOT C I  | <i>Lippia organoides</i>      | timol-carvacrol I  | p-Cymene (3.7%), thymyl methyl ether (4.6%), <i>trans</i> - $\beta$ -caryophyllene (7.9%), thymol (22.1%), carvacrol (10.7%), and thymyl acetate (3.9%) |
| LOT C II | <i>Lippia organoides</i>      | timol-carvacrol II | $\gamma$ -Terpinene (5.2%), p-cymene (1.1%), thymol (32.7%), carvacrol (18.8%), and <i>trans</i> - $\beta$ -caryophyllene (6.4%)                        |
| LOF      | <i>Lippia organoides</i>      | Felandreno         | $\alpha$ -Phellandrene (5.7%), 1,8-cineole (11.6%), p-cymene (5.7%), <i>trans</i> - $\beta$ -caryophyllene (10.4%), and $\alpha$ -humulene (6.2%).      |
| RO       | <i>Rosmarinus officinalis</i> |                    | $\alpha$ -Pinene (12.7%), camphene (7.7%), 1,8-cineole (17.5%), camphor (14.8%), and <i>trans</i> - $\beta$ -caryophyllene (7.8%).                      |
| SO       | <i>Salvia officinalis</i>     |                    | 1,8-Cineole (5.3%), <i>trans</i> -thujone (20.4%), <i>cis</i> -thujone (5.8%), camphor (8.5%), and $\alpha$ -humulene (9.8%).                           |
| SG       | <i>Swinglea glutinosa</i>     |                    | $\alpha$ -Pinene (2.6%), <i>trans</i> - $\beta$ -caryophyllene (36.6%), germacrene D (15.4%),                                                           |

|    |                         |  |                                                                                                                                                |
|----|-------------------------|--|------------------------------------------------------------------------------------------------------------------------------------------------|
|    |                         |  | germacrene B (10.8%), and <i>trans</i> -nerolidol (24.0%).                                                                                     |
| TL | <i>Tagetes lucida</i>   |  | Estragole (79.9%) and $\beta$ -myrcene (0.9%).                                                                                                 |
| TV | <i>Thymus vulgaris</i>  |  | $\gamma$ -Terpinene (9.5%), <i>p</i> -cymene (20%), linalool (4.7%), <i>trans</i> - $\beta$ -caryophyllene (9.5%), and thymol (23%).           |
| SV | <i>Satureja viminea</i> |  | 1-Isopropenyl-4-methyl-1-ciclohexane (24.4%), <i>trans</i> - $\beta$ -caryophyllene (11.8%), pulegone (11.1%), and <i>cis</i> -pulegol (7.1%). |
| CO | <i>Cananga odorata</i>  |  | Linalool (11.7%), methyl benzoate (3.7%), benzyl acetate (10.3%), ( <i>Z</i> )-cinnamyl acetate (5.4%), and benzyl benzoate (20.8%).           |

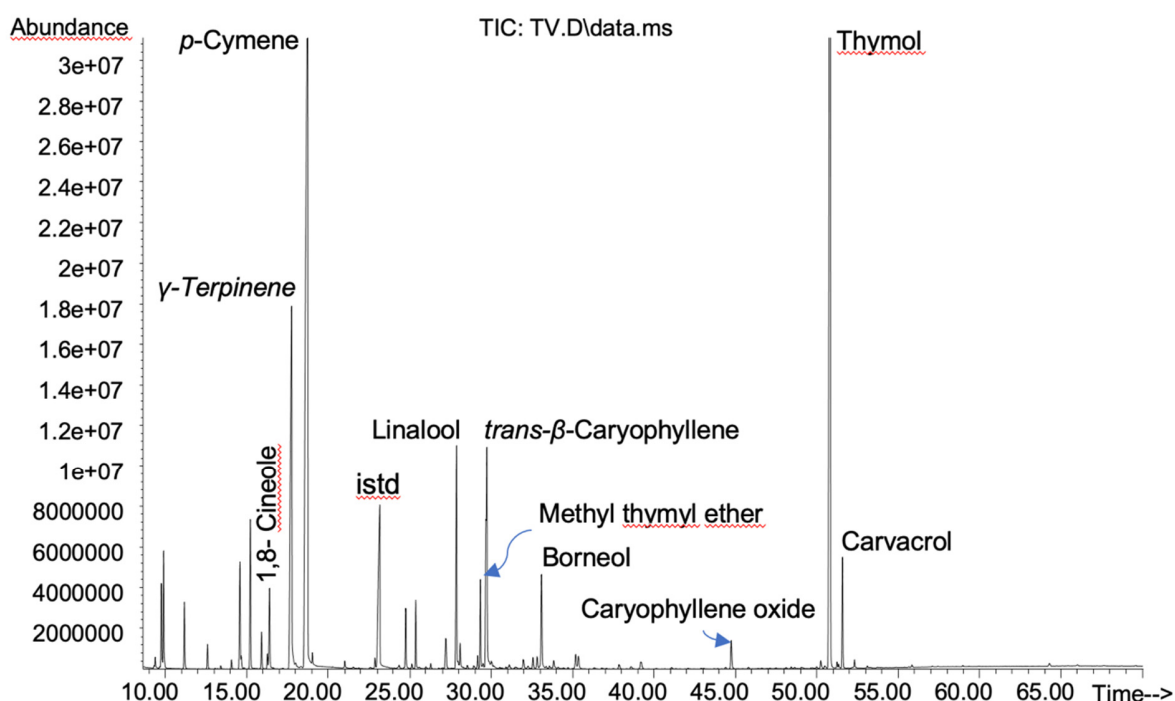

**Figure S1.** Figure 1S. Total ion current (TIC, chromatogram) obtained by GC/MS (electron ionization, 70 eV) of the *Lippia origanoides* (Verbenaceae family) hydrodistilled-essential oil. Polar DB-WAX (60 m) column. Split 1:30. Istd – internal standard (*n*-tetradecane).

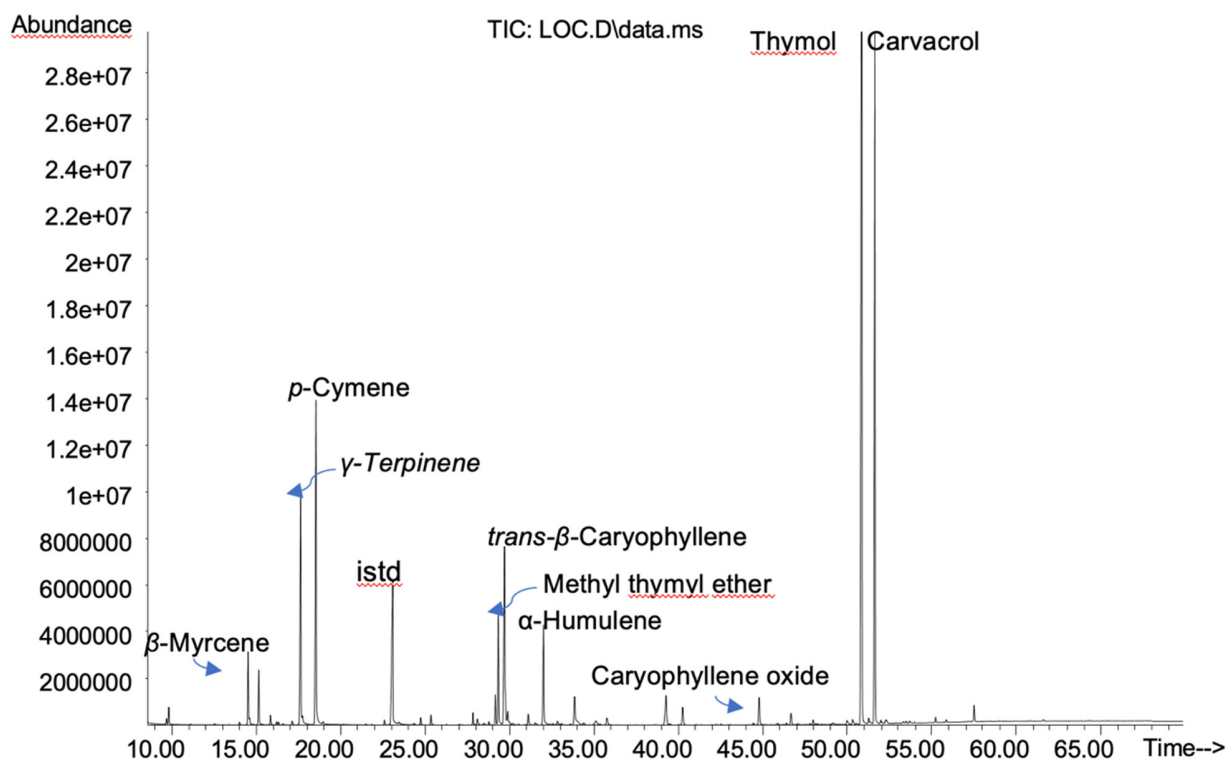

**Figure S2.** Total ion current (TIC, chromatogram) obtained by GC/MS (electron ionization, 70 eV) of the *Thymus vulgaris* (Labiatae family) hydrodistilled-essential oil. Polar DB-WAX (60 m) column. Split 1:30. Istd – internal standard (*n*-tetradecane).

**Table S2.** Minimum Inhibitory Concentration able to inhibiting 50% of bacterial growth (MIC<sub>50</sub>) and Minimum Bactericidal Concentration (MBC) in mg/mL determined for evaluated EOs. Experiments were performed in triplicate.

| Essential oils                  | <i>E. coli</i> ATCC 25922 |                           | <i>S. aureus</i> ATCC 29213 |                           |
|---------------------------------|---------------------------|---------------------------|-----------------------------|---------------------------|
|                                 | MBC (mg/mL)               | MIC <sub>50</sub> (mg/mL) | MBC (mg/mL)                 | MIC <sub>50</sub> (mg/mL) |
| <i>Lippia alba citral</i>       | > 1.5                     | >1.5                      | > 1.5                       | > 1.5                     |
| <i>Cymbopogon martini</i>       | > 1.5                     | > 1.5                     | > 1.5                       | > 1.5                     |
| <i>Lippia organoides LTC II</i> | 0.75                      | 0.45                      | 0.75                        | 0.45                      |
| <i>Lippia organoides LTC I</i>  | 1                         | 0.75                      | 1                           | 0.75                      |
| <i>Rosmarinus officinalis</i>   | 1.5                       | 1                         | 1.5                         | 1                         |
| <i>Lippia alba carvona</i>      | > 1.5                     | > 1.5                     | > 1.5                       | > 1.5                     |
| <i>Cymbopogon nordus</i>        | > 1.5                     | > 1.5                     | > 1.5                       | > 1.5                     |
| <i>Cymbopogon flexuosus</i>     | > 1.5                     | > 1.5                     | > 1.5                       | > 1.5                     |

|                                      |       |       |       |       |
|--------------------------------------|-------|-------|-------|-------|
| <i>Lippia origanoides felandreno</i> | 1.5   | 1     | > 1.5 | > 1.5 |
| <i>Salvia officinalis</i>            | >1.5  | >1.5  | >1.5  | >1.5  |
| <i>Swinglea glutinosa</i>            | > 1.5 | > 1.5 | 1.5   | 1     |
| <i>Tagetes lucida</i>                | > 1.5 | > 1.5 | > 1.5 | > 1.5 |
| <i>Thymus vulgaris</i>               | 1     | 0.75  | 1     | 0.75  |
| <i>Satureja viminea</i>              | > 1.5 | > 1.5 | > 1.5 | > 1.5 |
| <i>Cananga odorata</i>               | > 1.5 | > 1.5 | > 1.5 | > 1.5 |

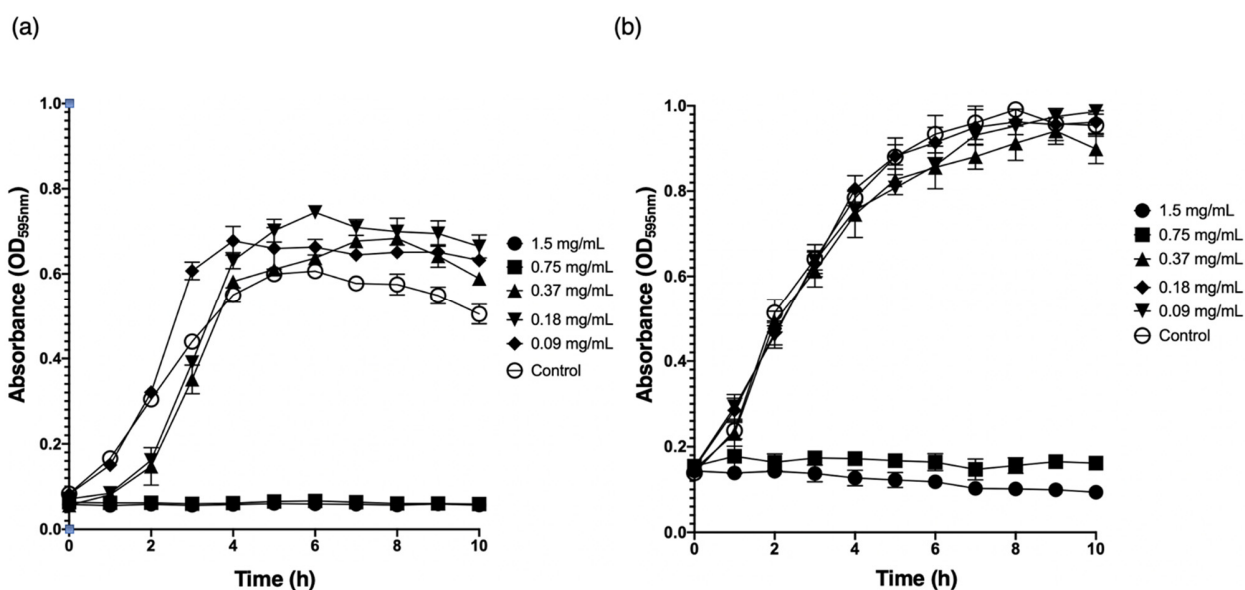

**Figure S3.** Antibacterial activity of the LTC II EO against the growth rate of *E. coli* ATCC 25922 (a) and *S. aureus* ATCC 29213 (b). Data are presented as the mean  $\pm$  SD of absorbance measured at 595 nm.

**Table S3.** Colony-forming units (CFU/mL), log reduction and inhibition percentage of bacterial growth of different concentrations of LTC II

| LTC II concentration (mg/mL) | <i>E. coli</i> ATCC 25922 |               |                        | <i>S. aureus</i> ATCC 29213 |               |                        |
|------------------------------|---------------------------|---------------|------------------------|-----------------------------|---------------|------------------------|
|                              | Planctonyc CFU/mL         | Log reduction | Inhibition percent (%) | CFU/mL                      | Log reduction | Inhibition percent (%) |
| 0.37                         | $5 \times 10^6$           | 0             | 0                      | $4.1 \times 10^8$           | 0             | 0                      |
| 0.40                         | $3.9 \times 10^6$         | 0             | 0                      | $3.6 \times 10^8$           | 0             | 0                      |
| 0.45                         | $1.9 \times 10^6$         | 0.82          | 56                     | $1.8 \times 10^8$           | 0.75          | 53                     |
| 0.50                         | $3.5 \times 10^5$         | 2.51          | 92                     | $2.4 \times 10^7$           | 2.79          | 94                     |

**Table S4.** Colony-forming units (CFU/mL), log reduction and inhibition percentage of biofilm formation of different concentrations of LTC II

| LTC II concentration (mg/mL) | <i>E. coli</i> ATCC 25922 |               |                        | <i>S. aureus</i> ATCC 29213 |               |                        |
|------------------------------|---------------------------|---------------|------------------------|-----------------------------|---------------|------------------------|
|                              | Sessile cells (CFU/mL)    | Log reduction | Inhibition percent (%) | CFU/mL                      | Log reduction | Inhibition percent (%) |
| 0.37                         | $4.4 \times 10^6$         | 0.1           | 24                     | $3.4 \times 10^8$           | 0.2           | 19                     |
| 0.40                         | $3.6 \times 10^6$         | 0.3           | 76                     | $1.2 \times 10^8$           | 1.2           | 72                     |
| 0.45                         | $2.5 \times 10^5$         | 2.9           | 94                     | $2.7 \times 10^7$           | 2.7           | 95                     |

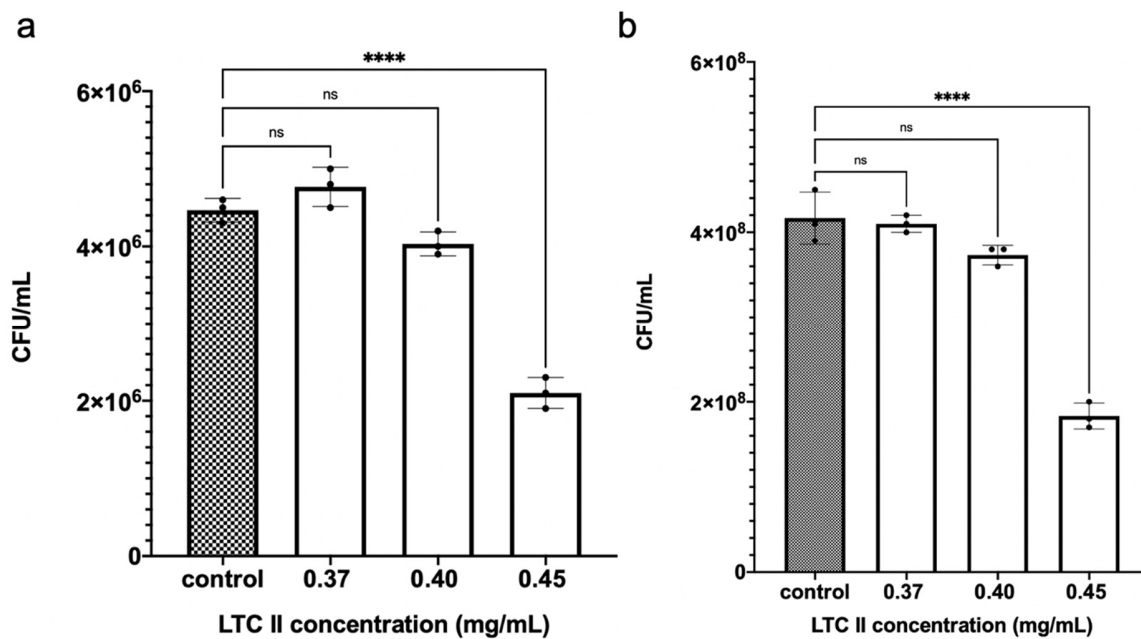

**Figure S4.** Colony Forming Unit (CFU/mL) of planktonic cells exposed to sub-MIC concentrations of LTC II in antibiofilm experiments of a) *E. coli* ATCC 25922 and b) *S. aureus* ATCC 29213. Each experiment was performed in triplicate and an ANOVA was performed.

**Table S5.** Antihemolytic effect of the 17 AEs against *S. aureus* ATCC. Each experiment was performed in triplicate and was expressed as a percentage of inhibition. Inhibition percentage was calculated taking into account raw results OD of the control and the treatment.

| Essential oil                    | EO concentration (mg/mL) | Hemolytic percent (%) | Planktonic cells (CFU/mL) |
|----------------------------------|--------------------------|-----------------------|---------------------------|
| <i>Lippia alba citral</i>        | 1.5                      | 83                    | $2.0 \times 10^8$         |
| <i>Cymbopogon martini</i>        | 1.5                      | 82                    | $1.8 \times 10^8$         |
| <i>Lippia origanoides LTC II</i> | 0.4                      | 46                    | $1.7 \times 10^8$         |

|                                        |      |     |                   |
|----------------------------------------|------|-----|-------------------|
| <i>Lippia organoides</i> LTC I         | 0.75 | 72  | $2.0 \times 10^9$ |
| <i>Rosmarinus officinalis</i>          | 1    | 88  | $2.4 \times 10^8$ |
| <i>Lippia alba</i> carvona             | 1.5  | 83  | $2.8 \times 10^8$ |
| <i>Cymbopogon nordus</i>               | 1.5  | 84  | $2.1 \times 10^8$ |
| <i>Cymbopogon flexuosus</i>            | 1.5  | 86  | $2.4 \times 10^8$ |
| <i>Lippia organoides</i> felandreno    | 1.5  | 95  | $1.9 \times 10^8$ |
| <i>Salvia officinalis</i>              | 1.5  | 80  | $2.5 \times 10^8$ |
| <i>Swinglea glutinosa</i>              | 1    | 77  | $1.7 \times 10^8$ |
| <i>Tagetes lucida</i>                  | 1.5  | 80  | $2.0 \times 10^9$ |
| <i>Thymus vulgaris</i>                 | 0.75 | 66  | $1.8 \times 10^8$ |
| <i>Satureja viminea</i>                | 1.5  | 98  | $2.3 \times 10^8$ |
| <i>Cananga odorata</i>                 | 1.5  | 94  | $2.0 \times 10^9$ |
| Control ( <i>S. aureus</i> ATCC 29213) | -    | 100 | $2.2 \times 10^8$ |

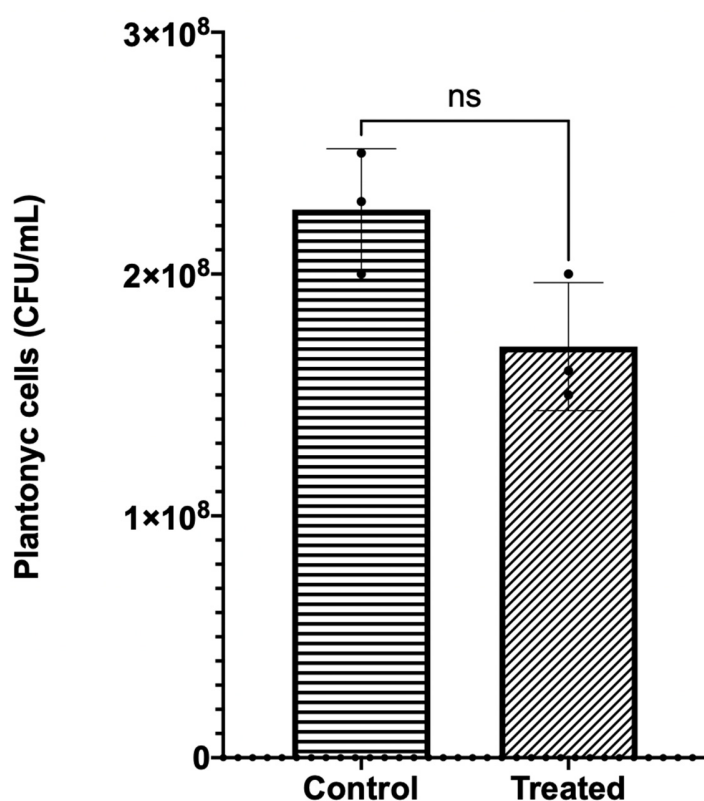

**Figure S5.** Colony Forming Units presented (CFU/mL) presented in log10, of the *S. aureus* ATCC 29213 planktonic cells treated and not treated with CTL II at subinhibitory concentrations of 0.40

mg / mL in the anti-hemolytic activity. The experiments were performed in triplicate and T-test was performed as statistical analysis.
